# Supplementary material
Source: HighWire-hosted journal article supplement (https://www.cmaj.ca/highwire/filestream/150423/field_highwire_adjunct_files/0/231498-five-1-at.pdf)
Supplement: 231498-five-1-at.pdf [file 231498-five-1-at.pdf]

**Appendix 1: Long-acting, injectable cabotegravir/rilpivirine for treatment of HIV-1 infection in adults(1,2)**

|                                                                     |                                                                                                                                                                                                                                                                                                                                                                                                                                                                                                                                                                                                        |
|---------------------------------------------------------------------|--------------------------------------------------------------------------------------------------------------------------------------------------------------------------------------------------------------------------------------------------------------------------------------------------------------------------------------------------------------------------------------------------------------------------------------------------------------------------------------------------------------------------------------------------------------------------------------------------------|
| Indications                                                         | Patients with HIV-1 infection who have had an undetectable (<50 copies/mL) viral load, on antiretroviral therapy<br>Required duration of prior virologic suppression not defined, but was 1-6 months in registrational trials                                                                                                                                                                                                                                                                                                                                                                          |
| Contraindications                                                   | Hepatitis B co-infection [requires a regimen containing tenofovir]<br>Known resistance to either cabotegravir or rilpivirine<br>Pregnancy or planning pregnancy [not studied in this population]                                                                                                                                                                                                                                                                                                                                                                                                       |
| Drug Interactions                                                   | <p>Contraindicated:</p> <ul style="list-style-type: none"> <li>- anticonvulsants [e.g. carbamazepine, oxcarbazepine, phenytoin, phenobarbital]</li> <li>- anti-mycobacterials [e.g. rifampin, rifapentine, rifabutin]</li> <li>- glucocorticoids [e.g. dexamethasone]</li> <li>- macrolides (except for azithromycin)</li> <li>- St. John's Wort</li> </ul> <p>Caution when co-administered with:</p> <ul style="list-style-type: none"> <li>- methadone</li> <li>- methotrexate</li> <li>- QT prolonging medications</li> </ul>                                                                       |
| Dosing and Administration                                           | <p>Oral lead-in (optional):<br/>30mg cabotegravir + 25mg rilpivirine once daily x 1 month, followed by:</p> <p>Intra-gluteal, intra-muscular (IM) injections:<br/>600mg cabotegravir IM + 900mg rilpivirine IM x 1, followed by:</p> <ul style="list-style-type: none"> <li>- 400mg cabotegravir IM + 600mg rilpivirine IM every 1 month OR</li> <li>- 600mg cabotegravir IM + 900mg rilpivirine IM at 1 month, and then 600mg cabotegravir IM + 900mg rilpivirine IM every 2 months</li> </ul> <p>Patients may receive cabotegravir/rilpivirine up to 7 days before- or after- the scheduled date</p> |
| Known Risk Factors for Virologic Failure despite on-time injections | <p>BMI &gt;30 kg/m<sup>2</sup></p> <p>HIV subtype A6/A1</p> <p>Pro-viral rilpivirine resistance-associated mutations</p>                                                                                                                                                                                                                                                                                                                                                                                                                                                                               |

|                |                                                                                                                                                                                                                                                                                                                                                                                                                                                                                                                       |
|----------------|-----------------------------------------------------------------------------------------------------------------------------------------------------------------------------------------------------------------------------------------------------------------------------------------------------------------------------------------------------------------------------------------------------------------------------------------------------------------------------------------------------------------------|
| Adverse Events | <p>Injection site reactions (ISRs)</p> <ul style="list-style-type: none"> <li>- median duration of ISRs is 3 days.</li> <li>- mostly mild and reduce in frequency over time</li> </ul> <p>Less common adverse events (&lt;2%):</p> <ul style="list-style-type: none"> <li>- injection-associated reactions (pyrexia, headache, musculoskeletal pain, nausea, dizziness, rash)</li> <li>- gastrointestinal disorders</li> <li>- hepatotoxicity</li> <li>- psychiatric disorders</li> <li>- hypersensitivity</li> </ul> |
|----------------|-----------------------------------------------------------------------------------------------------------------------------------------------------------------------------------------------------------------------------------------------------------------------------------------------------------------------------------------------------------------------------------------------------------------------------------------------------------------------------------------------------------------------|

### References

1. ViiV Healthcare ULC. Product Monograph Including Patient Medication Information - Vocabria and Cabenuva [Internet]. 2021 [cited 2023 Sep 13]. Available from: [https://viiivhealthcare.com/content/dam/cf-viiv/viiv-healthcare/en\\_GB/medicines/CABENUVA-VOCABRIA-PM-26-Mar-2021.pdf](https://viiivhealthcare.com/content/dam/cf-viiv/viiv-healthcare/en_GB/medicines/CABENUVA-VOCABRIA-PM-26-Mar-2021.pdf)
2. Cutrell AG, Schapiro JM, Perno CF, Kuritzkes DR, Quercia R, Patel P, et al. Exploring predictors of HIV-1 virologic failure to long-acting cabotegravir and rilpivirine: a multivariable analysis. *AIDS*. 2021 Jul 15;35(9):1333–42.
